# Supplementary material
Source: PubMed Central journal article supplement (PMC4613739)
Supplement: sc5b00498_si_001.pdf [file sc5b00498_si_001.pdf]

## **Supporting information**

### **Homocomposites of Polylactide (PLA) with Induced Interfacial Stereocomplex Crystallites**

*Veluska Arias, Karin Odelius, Anders Höglund and Ann-Christine Albertsson\**

Department of Fibre and Polymer Technology, KTH Royal Institute of Technology, SE-100 44, Stockholm,  
Sweden.

\*Corresponding Author: [aila@polymer.kth.se](mailto:aila@polymer.kth.se).

Tel.: +46-8-790 82 74. Fax: +46-8-20 84 77.

## Particles morphology

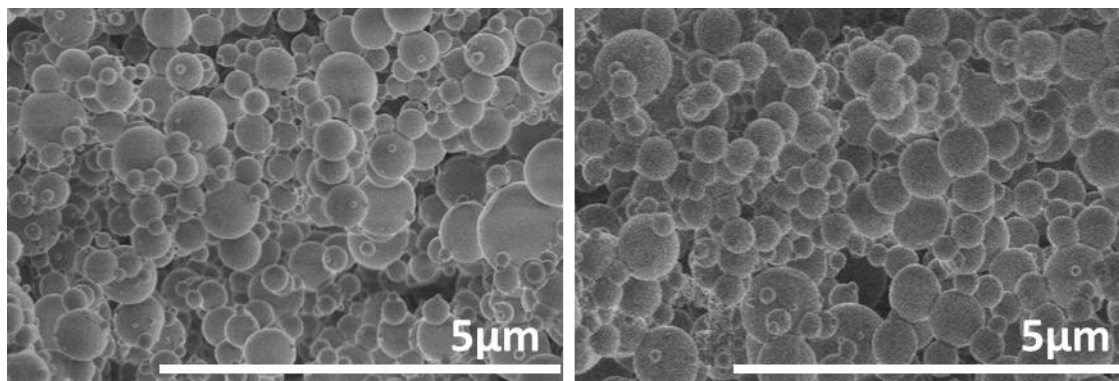

**Figure S1.** Morphology of the particles used as fillers, PLLA (left) and PLA stereocomplex (right).

## Materials properties after extrusion

**Table S1.** Particulate-homocomposite molar masses and dispersity after melt-blending.

| Material                   | $M_n$ (Da x $10^5$ ) <sup>a</sup> | $\mathcal{D}^a$ |
|----------------------------|-----------------------------------|-----------------|
| PLA <sub>high</sub>        | 0.87                              | 1.2             |
| PLA <sub>high</sub> (PLLA) | 0.78                              | 1.3             |
| PLA <sub>high</sub> (SC)   | 0.81                              | 1.2             |
| PLA <sub>med</sub>         | 1.57                              | 1.1             |
| PLA <sub>med</sub> (PLLA)  | 1.43                              | 1.1             |
| PLA <sub>med</sub> (SC)    | 1.52                              | 1.1             |
| PLA <sub>low</sub>         | 1.04                              | 1.1             |
| PLA <sub>low</sub> (PLLA)  | 1.00                              | 1.1             |
| PLA <sub>low</sub> (SC)    | 0.98                              | 1.1             |

<sup>a</sup>Determined by SEC using CHCl<sub>3</sub> as the eluent and PS standards.

## Particulate-homocomposites crystallization behavior

a)

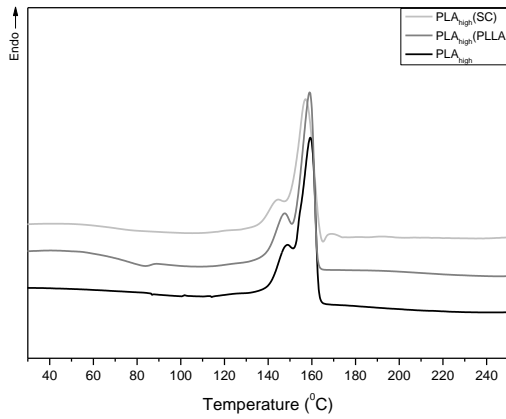

b)

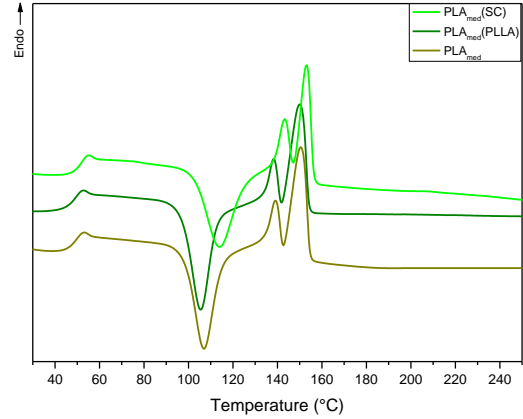

c)

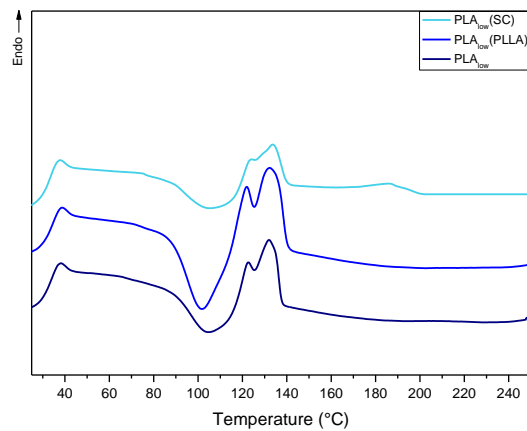

**Figure S2.** DSC thermograms of the 2<sup>nd</sup> heating scan of a) PLA<sub>high</sub>, PLA<sub>high</sub>(PLLA) and PLA<sub>high</sub>(SC); b) PLA<sub>med</sub>, PLA<sub>med</sub>(PLLA) and PLA<sub>med</sub>(SC) and c) PLA<sub>low</sub>, PLA<sub>low</sub>(PLLA) and PLA<sub>low</sub>(SC).

## Mechanical properties

**Table S2.** Elongation at break of the particulate-homocomposite materials.

| Material                   | $\epsilon$ (%) |
|----------------------------|----------------|
| PLA <sub>high</sub>        | 1,95 ± 0,3     |
| PLA <sub>high</sub> (PLLA) | 3,17 ± 0,4     |
| PLA <sub>high</sub> (SC)   | 2,28 ± 0,3     |
| PLA <sub>med</sub>         | 4,5 ± 0,6      |
| PLA <sub>med</sub> (PLLA)  | 3,94 ± 0,6     |
| PLA <sub>med</sub> (SC)    | 3,15 ± 0,4     |
| PLA <sub>low</sub>         | 3,52 ± 0,6     |
| PLA <sub>low</sub> (PLLA)  | 3,33 ± 0,5     |
| PLA <sub>low</sub> (SC)    | 1,7 ± 0,2      |

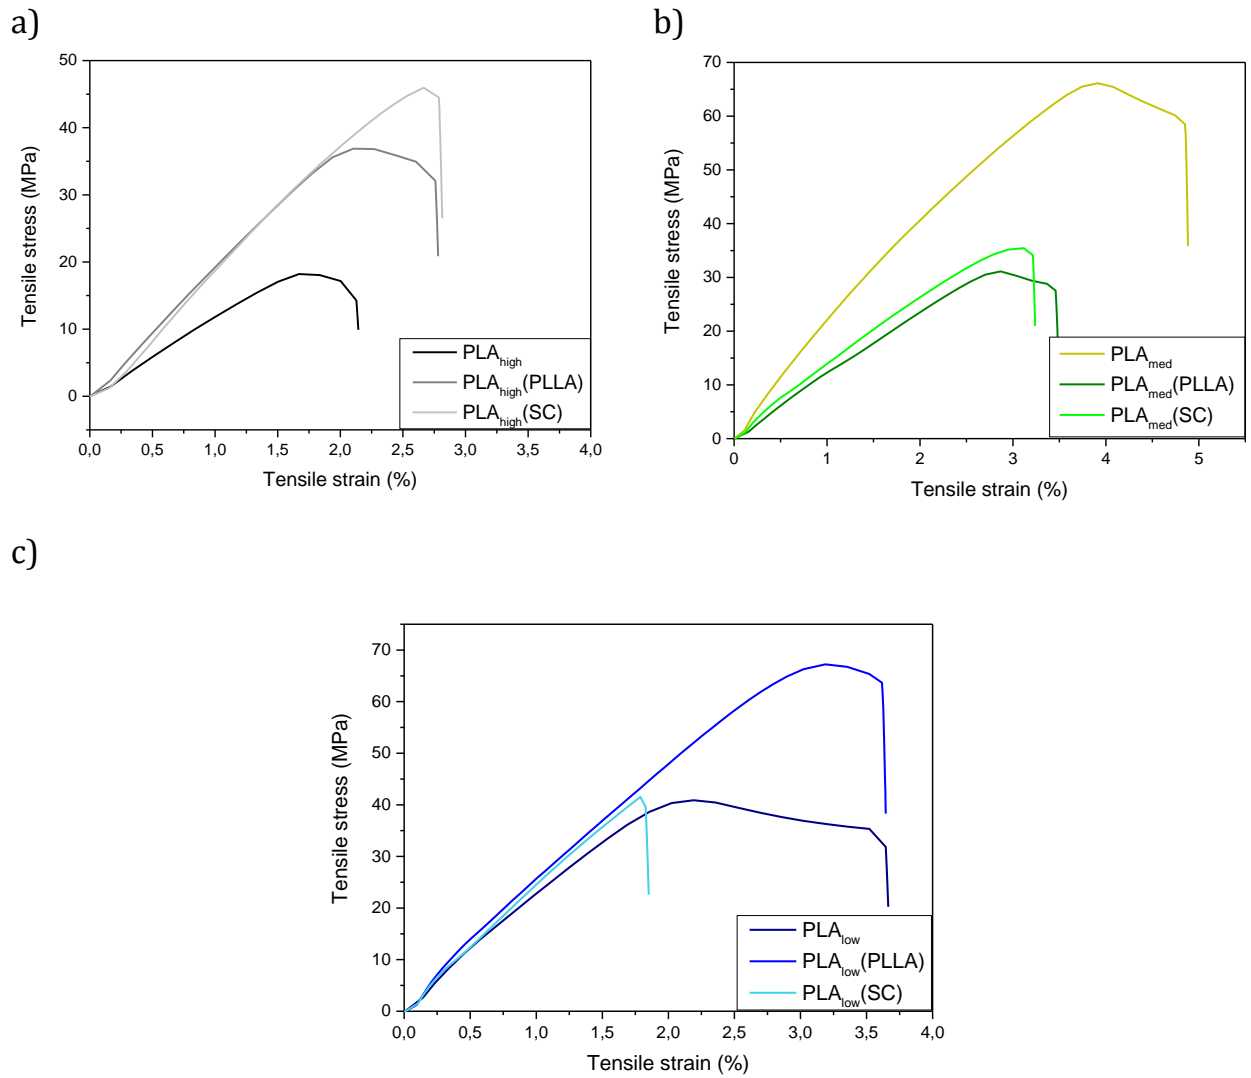

**Figure S3.** Representative tensile strength against tensile strain curves of the particulate-homocomposite materials: a) PLA<sub>high</sub>-based homocomposites, b) PLA<sub>med</sub>-based homocomposites and c) PLA<sub>low</sub>-based homocomposites.

## Effect of particle loading

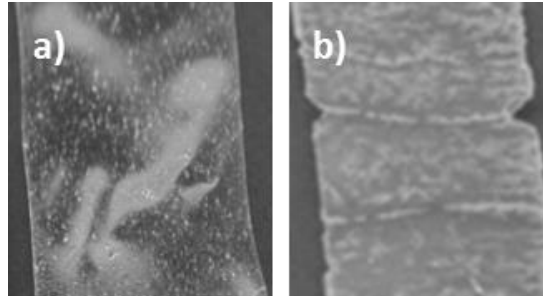

**FigureS4.** Particulate-homocomposites films at different SC particle loading: a) PLA<sub>high</sub>(SC) with 5 wt% particle loading and b) PLA<sub>high</sub>(SC) with 10 wt% particle loading.

## Particles thermal properties

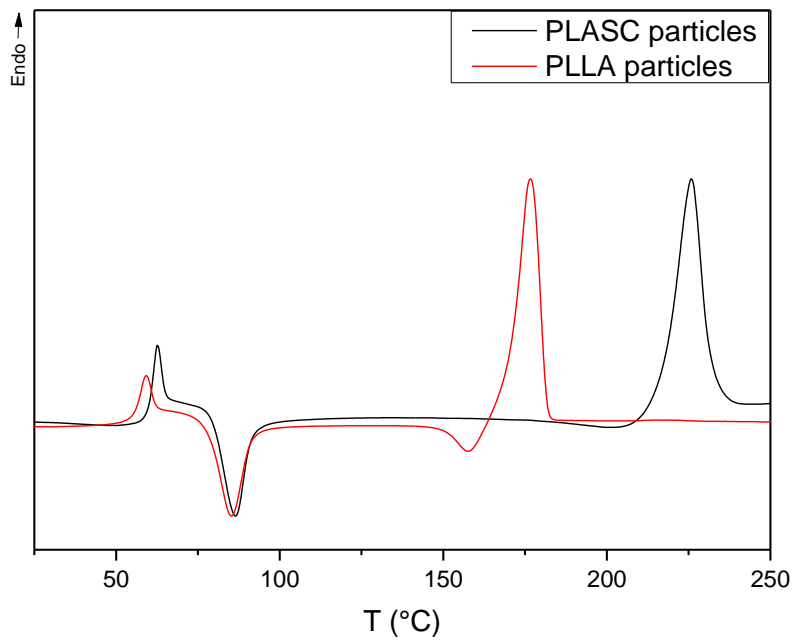

**Figure S5.** DSC thermograms of the 1<sup>st</sup> heating scan of the PLLA and PLASC particles used as fillers.
